# Supplementary material for: Genotype-by-Environment Interaction Analysis of Metabolites in Pearl Millet Genotypes with High Concentrations of Slowly Digestible and Resistant Starch in Their Grains
Source: MDPI journal article supplement (doi:10.3390/cells11193109), 2022-10-02
Supplement: s1 [file s1]

**Supplementary Table S4 Combined analysis of variance for health benefiting metabolites significant at  $p < 0.05$  in pearl millet.**

| m/z        | Class        | Genotype Variance | GenXLoc Variance | Environment Variance | Residual Variance | Grand Mean | LSD      | CV       |
|------------|--------------|-------------------|------------------|----------------------|-------------------|------------|----------|----------|
| n164.04323 | Antioxidants | 1.7E-09           | 4.18E-10         | 1.21E-09             | 7.98E-09          | 0.000207   | 4.71E-05 | 43.21871 |
| n285.04037 | Antioxidants | 1.2E-09           | 4.87E-10         | 1.92E-09             | 5.04E-09          | 0.000115   | 4.33E-05 | 61.63316 |
| n163.03986 | Antioxidants | 3.73E-07          | 1.41E-07         | 1.89E-07             | 1.74E-06          | 0.002855   | 0.000723 | 46.17466 |
| n577.15649 | Antioxidants | 3.81E-08          | 3.81E-08         | 6.81E-08             | 1.83E-07          | 0.000547   | 0.000291 | 78.27277 |
| n315.05084 | Antioxidants | 5.51E-10          | 2.63E-10         | 1.28E-09             | 3.93E-09          | 0.000126   | 3.53E-05 | 49.69046 |
| n171.04079 | Antioxidants | 1.11E-09          | 1.2E-09          | 1.74E-09             | 1.03E-08          | 0.000381   | 5.37E-05 | 26.60734 |
| n321.07718 | Antioxidants | 2.97E-10          | 4.33E-10         | 1.18E-09             | 3.57E-09          | 0.000158   | 3.04E-05 | 37.71087 |
| p596.16833 | Antioxidants | 5.17E-10          | 1.58E-10         | 8.64E-10             | 3.15E-09          | 4.63E-05   | 2.9E-05  | 121.2265 |
| p156.04158 | Antioxidants | 4.86E-07          | 2.44E-07         | 1.82E-07             | 3.49E-06          | 0.003674   | 0.000914 | 50.81597 |
| p665.16705 | Antioxidants | 1.32E-08          | 1.12E-08         | 5.37E-09             | 1.06E-07          | 0.00147    | 0.000168 | 22.1178  |
| p204.10138 | Antioxidants | 7.9E-11           | 1.17E-10         | 1.53E-10             | 6.66E-10          | 8.3E-05    | 1.51E-05 | 31.0839  |
| p89.10734  | Antioxidants | 3.32E-09          | 6.04E-09         | 2.68E-09             | 3.59E-08          | 0.000249   | 0.000102 | 76.04043 |
| p72.08089  | Antioxidants | 5.17E-09          | 5.28E-09         | 3.85E-09             | 4.2E-08           | 0.000615   | 0.000134 | 33.33791 |
| n976.30536 | Fatty acid   | 1.52E-09          | 1.16E-09         | 3.45E-09             | 1.61E-08          | 0.000341   | 6.13E-05 | 37.26804 |
| n977.31036 | Fatty acid   | 1.98E-10          | 2.29E-10         | 3.93E-10             | 2.25E-09          | 0.000139   | 2.36E-05 | 34.12852 |
| n321.07718 | Fatty acid   | 2.97E-10          | 4.33E-10         | 1.18E-09             | 3.57E-09          | 0.000158   | 3.04E-05 | 37.71087 |
| p158.03967 | Fatty acid   | 1.8E-09           | 8.55E-10         | 5.99E-10             | 1.29E-08          | 0.000203   | 5.49E-05 | 55.92724 |
| p156.04158 | Fatty acid   | 4.86E-07          | 2.44E-07         | 1.82E-07             | 3.49E-06          | 0.003674   | 0.000914 | 50.81597 |
| p160.03647 | Fatty acid   | 1.48E-09          | 6.69E-10         | 1.62E-09             | 1.45E-08          | 0.000233   | 5.5E-05  | 51.76542 |
| p72.08089  | Fatty acid   | 5.17E-09          | 5.28E-09         | 3.85E-09             | 4.2E-08           | 0.000615   | 0.000134 | 33.33791 |
| n666.21851 | Starch       | 1.59E-10          | 6.41E-11         | 1.01E-10             | 1.18E-09          | 8.43E-05   | 1.65E-05 | 40.77659 |
| n703.18823 | Starch       | 9.03E-09          | 7.63E-09         | 1.67E-08             | 5.87E-08          | 0.000656   | 0.000142 | 36.92287 |
| n701.19135 | Starch       | 9.49E-08          | 8.47E-08         | 1.88E-07             | 6.27E-07          | 0.002212   | 0.000465 | 35.78216 |
| n505.15646 | Starch       | 2.61E-09          | 2.94E-09         | 1.44E-09             | 1.94E-08          | 0.000268   | 7.88E-05 | 51.99605 |
| n541.1355  | Starch       | 2.89E-07          | 3.85E-07         | 1.28E-06             | 4.16E-06          | 0.007515   | 0.000957 | 27.13685 |
| n267.07184 | Starch       | 3.98E-08          | 7.17E-08         | 8.51E-08             | 3.88E-07          | 0.002475   | 0.000355 | 25.14975 |
| n204.08746 | Starch       | 1.59E-10          | 2.01E-10         | 3.46E-10             | 2.83E-09          | 0.000238   | 2.28E-05 | 22.31806 |
| n539.13831 | Starch       | 2.53E-06          | 3.93E-06         | 1.24E-05             | 4.1E-05           | 0.023735   | 0.002937 | 26.99229 |
| n179.05588 | Starch       | 2.19E-07          | 4.05E-07         | 2.61E-06             | 2.88E-06          | 0.004418   | 0.000871 | 38.42367 |
| n504.16653 | Starch       | 6.99E-10          | 1E-09            | 2.49E-09             | 1.76E-08          | 0.000523   | 5.11E-05 | 25.38856 |
| p705.1828  | Starch       | 1.26E-07          | 3.74E-08         | 7.65E-08             | 6.59E-07          | 0.002935   | 0.000419 | 27.67346 |
| p689.20892 | Starch       | 4.08E-09          | 2.03E-09         | 1.22E-09             | 2.29E-08          | 0.000468   | 7.95E-05 | 32.36706 |
| p177.05414 | Starch       | 5.27E-10          | 3.89E-10         | 5.41E-10             | 7.13E-09          | 0.000174   | 3.67E-05 | 48.53046 |
| n285.04037 | Vitamins     | 1.2E-09           | 4.87E-10         | 1.92E-09             | 5.04E-09          | 0.000115   | 4.33E-05 | 61.63316 |
| n593.15131 | Vitamins     | 1.93E-07          | 9.91E-08         | 2.95E-07             | 8.85E-07          | 0.001623   | 0.000574 | 57.94342 |
| n629.12787 | Vitamins     | 1.86E-07          | 1.34E-07         | 2.4E-07              | 6.21E-07          | 0.001598   | 0.000578 | 49.32689 |
| n431.09821 | Vitamins     | 2.7E-07           | 2.19E-07         | 2.07E-07             | 7.05E-07          | 0.001059   | 0.000688 | 79.28266 |
| n380.1561  | Vitamins     | 3.61E-09          | 2.12E-09         | 2.01E-09             | 1.9E-08           | 0.000432   | 7.84E-05 | 31.93451 |
| n327.11249 | Vitamins     | 1.85E-10          | 8.16E-11         | 1.1E-10              | 1.41E-09          | 4.67E-05   | 1.81E-05 | 80.31226 |
| n631.12506 | Vitamins     | 1.7E-08           | 1.44E-08         | 2.2E-08              | 6.45E-08          | 0.00041    | 0.000183 | 61.9653  |

|            |          |          |          |          |          |          |          |          |
|------------|----------|----------|----------|----------|----------|----------|----------|----------|
| n256.05936 | Vitamins | 6.67E-11 | 4.98E-11 | 1.52E-10 | 5.48E-10 | 4.25E-05 | 1.23E-05 | 54.99522 |
| n315.05084 | Vitamins | 5.51E-10 | 2.63E-10 | 1.28E-09 | 3.93E-09 | 0.000126 | 3.53E-05 | 49.69046 |
| n447.09317 | Vitamins | 3.3E-09  | 3.08E-09 | 5.31E-09 | 2.94E-08 | 0.00027  | 9E-05    | 63.61719 |
| p176.01033 | Vitamins | 8.06E-09 | 2.81E-09 | 5.88E-09 | 3.84E-08 | 0.000598 | 0.000108 | 32.78016 |
| p160.03647 | Vitamins | 1.48E-09 | 6.69E-10 | 1.62E-09 | 1.45E-08 | 0.000233 | 5.5E-05  | 51.76542 |
| p138.05461 | Vitamins | 1.36E-07 | 9.77E-08 | 1.76E-07 | 1.02E-06 | 0.003185 | 0.000539 | 31.72671 |
| p94.06503  | Vitamins | 5.2E-10  | 3.31E-10 | 4.17E-10 | 4.45E-09 | 0.000146 | 3.29E-05 | 45.82165 |
| p139.0578  | Vitamins | 8.35E-10 | 4.29E-10 | 7.5E-10  | 6.06E-09 | 0.000225 | 4.3E-05  | 34.57306 |
| p221.12808 | Vitamins | 3.2E-11  | 3.75E-11 | 3.69E-11 | 1.77E-10 | 3.48E-05 | 8.73E-06 | 38.21265 |
| p120.04417 | Vitamins | 2.9E-11  | 2.57E-11 | 6.16E-11 | 2.83E-10 | 3.56E-05 | 8.52E-06 | 47.29352 |
| p345.10172 | Vitamins | 6.28E-10 | 3.79E-10 | 6.23E-10 | 4.77E-09 | 0.000147 | 3.85E-05 | 46.84449 |
| p171.14864 | Vitamins | 2.46E-11 | 3.48E-11 | 3.97E-11 | 1.09E-10 | 1.56E-05 | 7.91E-06 | 66.71508 |
| p124.07535 | Vitamins | 1.96E-10 | 1.84E-10 | 2.1E-10  | 2.08E-09 | 0.000121 | 2.23E-05 | 37.69499 |
| p110.06004 | Vitamins | 1.7E-11  | 1.66E-11 | 2.37E-11 | 2.45E-10 | 4.41E-05 | 6.94E-06 | 35.49936 |
